# Supplementary material for: Activation of the NLRP3 Inflammasome Increases the IL-1β Level and Decreases GLUT4 Translocation in Skeletal Muscle during Insulin Resistance
Source: MDPI journal article supplement (doi:10.3390/ijms221910212), 2021-09-23
Supplement: s1 [file s1]

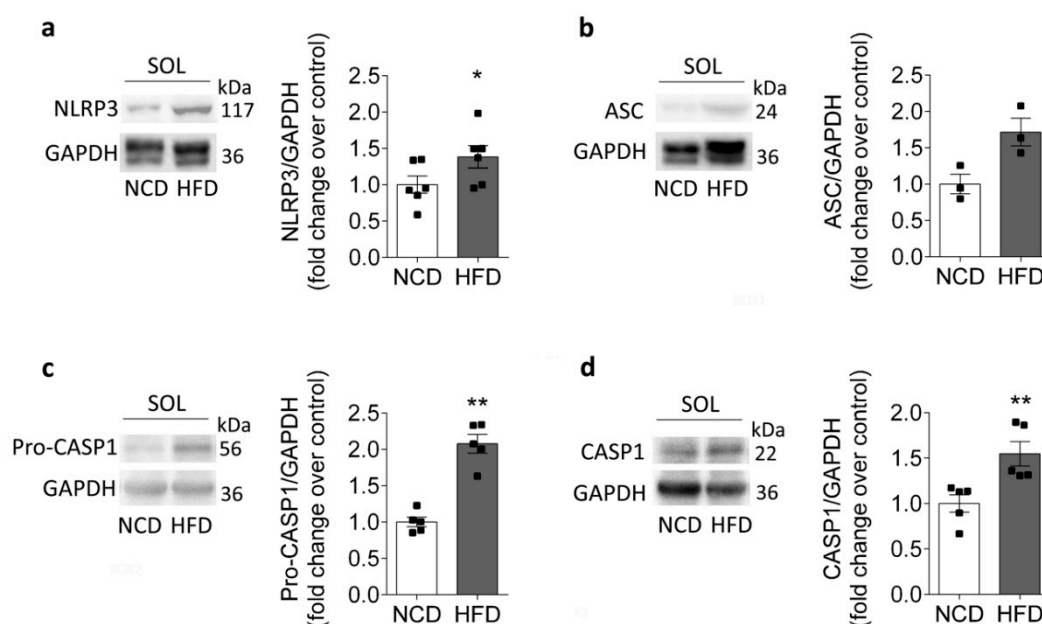

**Supplementary Materials Figure S1.** Elevated protein content of the NLRP3 inflammasome in the soleus muscle from HFD- compared to NCD-fed mice. Representative Western blot and quantification showing (a) NLRP3, (b) ASC, (c) pro-caspase-1, and (d) caspase-1 protein content. The measures were performed with homogenates prepared from the soleus muscle isolated from NCD- or HFD-fed mice after 8 weeks on the diets. GAPDH was used as a housekeeping loading control. Each lane was loaded with 60  $\mu$ g of protein. Values represent the mean  $\pm$  SEM ( $n = 3-6$ ). \*  $p < 0.05$  and \*\*  $p < 0.01$ , determined by Student's  $t$ -test. NCD, normal control diet; HFD, high-fat diet.
